# Supplementary material for: MXene Core-Shell Nanosheets: Facile Synthesis, Optical Properties, and Versatile Photonics Applications
Source: MDPI journal article supplement (doi:10.3390/nano11081995), 2021-08-03
Supplement: s1 [file s1]

**Supplementary Materials for manuscript**  
**“MXene Core-Shell Nanosheets: Facile Synthesis, Optical Properties and**  
**Vesatile Photonics Applications”**

**Yunjia Wang, Shunxiang Liu, Feng Zhu, Yiyu Gan and Wen Qiao \***

**Table S1.** Output performance comparison of mode-locked fiber lasers using various 2D materials SAs at a wavelength of 1.55  $\mu\text{m}$ .

| Materials     | SA                                | Modulation Depth (%) | Output Power (mW) | Pump Power (mW) | Pulse Width (fs) | 3-dB Spectral Width (nm) | Radio Frequency (dB) | Ref. |
|---------------|-----------------------------------|----------------------|-------------------|-----------------|------------------|--------------------------|----------------------|------|
| <b>GR</b>     | Graphene                          | 66.5                 | 2                 | 70              | 756              | NA                       | 65                   | [1]  |
|               | GR oxide                          | 1.4                  | 0.83              | 34.5            | 613              | 4.2                      | 70                   | [2]  |
| <b>BP</b>     | BP                                | 9                    | 2                 | 30              | 940              | 3.39                     | 50                   | [3]  |
|               | BPQDs                             | 5                    | NA                | 75              | 1007             | 3.4                      | 50                   | [4]  |
| <b>TIs</b>    | $\text{Bi}_2\text{Se}_3$          | 15.7                 | 0.8               | 55              | 600              | 4.63                     | 65                   | [5]  |
|               | $\text{Sb}_2\text{Te}_3$          | NA                   | 0.5               | 45              | 1800             | 1.8                      | 60                   | [6]  |
| <b>TMDs</b>   | $\text{WS}_2$                     | 5.1                  | 1.8               | 85              | 21100            | 14.5                     | NA                   | [7]  |
|               | $\text{MoS}_2$                    | 4.3                  | 1.78              | 22              | 710              | 4                        | 60                   | [8]  |
| <b>MXenes</b> | $\text{Ti}_3\text{C}_2\text{T}_x$ | 29.3                 | NA                | 50              | NA               | NA                       | NA                   | [9]  |
|               | $\text{Ti}_3\text{C}_2\text{T}_x$ | NA                   | NA                | 263             | 530              | 5.04                     | NA                   | [10] |
|               | $\text{Ti}_3\text{C}_2\text{T}_x$ | 0.96                 | NA                | 146             | 1280             | 2.71                     | 71                   | [11] |
|               | $\text{Ti}_3\text{C}_2\text{T}_x$ | 11.3                 | 0.283             | 118.5           | 597              | 5.21                     | 55.2                 | [12] |
|               | $\text{Ti}_3\text{C}_2\text{T}_x$ | 4.75                 | 1.4               | 70              | 114              | 25.6                     | 65                   | [13] |
|               | $\text{Ti}_3\text{C}_2\text{T}_x$ | 20                   | 3                 | 238             | 159              | 22.2                     | 62                   | [14] |
|               | $\text{Ti}_3\text{C}_2\text{T}_x$ | 41                   | NA                | 60              | 946              | 3.1                      | 70.7                 | [15] |
|               | $\text{Ti}_3\text{C}_2\text{T}_x$ | NA                   | 3.48              | 400             | 800              | 3.75                     | 65                   | [16] |
|               | $\text{Ti}_3\text{CNT}_x$         | 1.7                  | 0.05              | 22              | 660              | 5                        | 60                   | [17] |
|               | $\alpha\text{-Mo}_2\text{C}$      | 4.29                 | NA                | 127.1           | 2790             | 1.66                     | 45                   | [18] |
|               | $\alpha\text{-Mo}_2\text{C}$      | 10.45                | NA                | 100             | 313              | 13.75                    | 79                   | [19] |
|               | $\text{Ti}_2\text{CT}_x$          | NA                   | 2.91              | 102             | 265              | 11.1                     | 47                   | [20] |
|               | $\text{Ti}_2\text{CT}_x$          | 15.7                 | NA                | 65              | 5300             | 3.4                      | 62                   | [21] |

|                                     |                                     |     |       |    |     |     |    |           |
|-------------------------------------|-------------------------------------|-----|-------|----|-----|-----|----|-----------|
| Ti <sub>2</sub> CT <sub>x</sub> @Au | Ti <sub>2</sub> CT <sub>x</sub> @Au | 6.6 | 0.491 | 20 | 670 | 3.2 | 62 | This work |
|-------------------------------------|-------------------------------------|-----|-------|----|-----|-----|----|-----------|

**Table S2.** Progress of SFFLs based on LCLM with 2D material

| SA                   | Gain Medium | Linewidth [kHz] | SNR [dB] | Power [mW] | Power Fluctuation [%] | Reference |
|----------------------|-------------|-----------------|----------|------------|-----------------------|-----------|
| Graphene             | YDF         | NA              | ~60      | 16         | NA                    | [22]      |
| MoS <sub>2</sub>     | YDF         | 5.89            | ~60      | 15.3       | <±2.7                 | [23]      |
| Ni-MOFs              | EDF         | 3.2             | >52      | 1.07       | <1.3                  | [24]      |
| MXene QDs            | EDF         | 5               | 54       | 7.6        | <0.75                 | [25]      |
| Ti <sub>2</sub> C    | EDF         | 1.3             | >38      | 1.44/5.34  | <1.8/<7.1             | [26]      |
| Ti <sub>2</sub> C@Au | EDF         | 1               | 48.77    | 1.18/11.16 | 0.76/1.34             | This Work |

## References

- Bao, Q.L.; Zhang, H.; Wang, Y.; Ni, Z.H.; Yan, Y.L.; Shen, Z.X.; Loh K.P.; Tang, D.Y. Atomic-Layer Graphene as a Saturable Absorber for Ultrafast Pulsed Lasers. *Adv. Funct. Mater.* **2009**, *19*, 3077-3083.
- Boguslawski, J.; Sotor, J.; Sobon, G.; Kozinski, R.; Librant, K.; Aksienionek, M.; Lipinska, L.; Abramski, K.M. Graphene oxide paper as a saturable absorber for Er- and Tm-doped fiber lasers. *Photonics Res.* **2015**, *3*, 119-124.
- Luo, Z.C.; Liu, M.; Guo, Z.N.; Jiang, X.F.; Luo, A.P.; Zhao, C.J.; Yu, X.F.; Xu, W.C.; Zhang, H. Microfiber-based few-layer black phosphorus saturable absorber for ultra-fast fiber laser. *Opt. Express.* **2015**, *23*, 20030-20039.
- Xu, Y.; Wang, W.; Ge, Y.; Guo, H.; Zhang, X.; Chen, S.; Deng, Y.; Lu, Z.; Zhang, H. Stabilization of black phosphorous quantum dots in PMMA nanofiber film and broadband nonlinear optics and ultrafast photonics application. *Adv. Funct. Mater.* **2017**, *27*, 1702437-1702443.
- Lee, J.S.; Koo, J.; Jhon, Y.M.; Lee J.H. A femtosecond pulse erbium fiber laser incorporating a saturable absorber based on bulk-structured Bi<sub>2</sub>Te<sub>3</sub> topological insulator. *Opt. Express* **2014**, *22*, 6165-6173.
- Sotor, J.; Sobon, G.; Macherzynski, W.; Paletko, P.; Grodecki, K.; Abramski, K.M. Mode-locking in Er-doped fiber laser based on mechanically exfoliated Sb<sub>2</sub>Te<sub>3</sub> saturable absorber. *Optical Materials Express* **2014**, *4*, 1-6.
- Mao, D.; Zhang, S.L.; Wang, Y.D.; Gan, X.T.; Zhang, W.D.; Mei, T.; Wang, Y.G.; Wang, Y.S.; Zeng, H.B.; Zhao, J.L. WS<sub>2</sub> saturable absorber for dissipative soliton mode locking at 1.06 and 1.55 um. *Opt. Express* **2015**, *23*, 27509-27519.
- Liu, H.; Luo, A.P.; Wang, F.Z.; Tang, R.; Zhang, H. Femtosecond pulse erbium-doped fiber laser by a few-layer MoS<sub>2</sub> saturable absorber. *Opt. Lett.* **2014**, *39*, 4591-4594.
- Wang, Z.H.; Li, H.B.; Luo, M.L.; Chen, T.H.; Xia, X.F.; Chen, H.L.; Ma, C.Y.; Guo, J.; He, Z.W.; Song, Y.F.; Liu, J.; Jiang, X.T.; Zhang, H. MXene photonic devices for near-Infrared to mid-Infrared ultrashort pulse generation. *ACS Appl. Nano Mater.* **2020**, *3*, 3513-3522.
- Je, K.J.; Min, K.C.; Bae, L.S.; Kwanil, L. Novel sturable absorber based on 2D nanomaterial, MXene solution **2019**.
- Feng, J.; Li, X.; Feng, T.; Wang, Y.; Liu, J.; Zhang, H. Harmonic Mode-Locked Er-Doped Fiber Laser by Evanescent Field-Based MXene Ti<sub>3</sub>C<sub>2</sub>T<sub>x</sub> (T= F, O, or OH) Saturable Absorber *Ann. Phys. (Germany)* **2020**, *532*, 1900437-1900443.

12. Wu, Q.; Jin, X.; Chen, S.; Jiang, X.; Hu, Y.; Jiang, Q.; Wu, L.; Li, J.; Zheng, Z.; Zhang, M.; Zhang, H. MXene-based saturable absorber for femtosecond mode-locked fiber lasers *Opt. Express*. **2019**, *27*, 10159-10170.
13. Jiang, X.; Li, W.; Hai, T.; Yue, R.; Chen, Z.; Lao, C.; Ge, Y.; Xie, G.; Wen, Q.; Zhang, H. Inkjet-printed MXene micro-scale devices for integrated broadband ultrafast photonics *npj 2D Mater. Appl.* **2019**, *3*, 1-9.
14. Jiang, X.; Liu, S.; Liang, W.; Luo, S.; He, Z.; Ge, Y.; Wang, H.; Cao, R.; Zhang, F.; Wen, Q. Broadband nonlinear photonics in few-layer MXene  $\text{Ti}_3\text{C}_2\text{Tx}$  (T = F, O, or OH). *Laser & Photonics Reviews* **2018**, *12*, 1700221-1700229.
15. Li, J.; Zhang, Z.; Du, L.; Miao, L.; Yi, J.; Huang, B.; Zou, Y.; Zhao, C.; Wen, S. Highly stable femtosecond pulse generation from a MXene  $\text{Ti}_3\text{C}_2\text{Tx}$  (T = F, O, or OH) mode-locked fiber laser. *Photonics Res.* **2019**, *7*, 260-264.
16. Je, K.J.; Hyerim, K.; Min, K.C.; Ha, L.J.; Bae, L.S.; Kwanil, L. Femtosecond Mode-locked Fiber Laser Using an Etched Optical Fiber Immersed in Liquid Mxene as a Saturable Absorber 23rd Opto-Electronics and Communications Conference (OECC), **2018**, *2*.
17. Jhon, Y.I.; Koo, J.; Anasori, B.; Seo, M.; Lee, J.H.; Gogotsi, Y.; Jhon, Y.M. Metallic MXene saturable absorber for femtosecond mode-locked lasers. *Adv. Mater.* **2017**, *29*, 1702496-1702502.
18. Tuo, M.; Xu, C.; Mu, H.; Bao, X.; Wang, Y.; Xiao, S.; Ma, W.; Li, L.; Tang, D.; Zhang, H.; Premaratne, M.; Sun, B.; Cheng, H.M.; Li, S.; Ren, W.; Bao, Q. Ultrathin 2D Transition Metal Carbides for Ultrafast Pulsed Fiber Lasers *Acs Photonics*. **2018**, *5*, 1808-1816.
19. Liu, S.; Wang, Y.; Lv, R.; Wang, J.; Wang, H.; Wang, Y.; Duan, L. 2D molybdenum carbide ( $\text{Mo}_2\text{C}$ )/fluorine mica (FM) saturable absorber for passively mode-locked erbium-doped all-fiber laser. *Nanophotonics* **2020**, *9*, 2523-2530.
20. Shi, Y.H.; Xu, N.; Wen, Q.  $\text{Ti}_2\text{CTx}$  (T=O, OH or F) Nanosheets as New Broadband Saturable Absorber for Ultrafast Photonics. *J. Lightwave Technol.* **2020**, *38*, 1975-1980.
21. Yi, J.; Du, L.; Li, J.; Yang, L.; Hu, L.; Huang, S.; Dong, Y.; Miao, L.; Wen, S.; Mochalin, V.N. Unleashing the potential of  $\text{Ti}_2\text{CTx}$  MXene as a pulse modulator for mid-infrared fiber lasers. *2D Mater.* **2019**, *6*, 045038-045043.
22. Deng, J.; Chen, H.; Lu, B.; Yin, M.; Li, D.; Jiang, M.; Bai, J. Single frequency Yb-doped fiber laser based on graphene loop mirror filter. *Journal of Optics* **2015**, *17*, 025802-025809.
23. Lu, B.; Yuan, L.; Qi, X.; Hou, L.; Sun, B.; Fu, P.; Bai, J.  $\text{MoS}_2$  saturable absorber for single frequency oscillation of highly Yb-doped fiber laser. *Chinese Optics Letters* **2016**, *14*, 071404-071411.
24. Sun, Z.H.; Jiang, X.J.; Wen, Q.; Li, W.J.; Zhang, H. Single frequency fiber laser based on an ultrathin metal-organic framework *J. Mater. Chem. C* **2019**, *7*, 4662-4666.
25. Xu, N.; Li, H.; Gan, Y.; Chen, H.; Li, W.; Zhang, F.; Jiang, X.; Shi, Y.; Liu, J.; Wen, Q.; Zhang, H. Zero-Dimensional MXene-Based Optical Devices for Ultrafast and Ultranarrow Photonics Applications. *Adv. Sci.* **2020**, *7*, 2002209-2002216.
26. Gan, Y.; Zhu, F.; Shi, Y.; Wen, Q. Single frequency fiber laser base on MXene with kHz linewidth. *J. Mater. Chem. C* **2021**, *9*, 2276-2281.
